# Supplementary material for: m6A Reader YTHDC2 Promotes Radiotherapy Resistance of Nasopharyngeal Carcinoma via Activating IGF1R/AKT/S6 Signaling Axis
Source: Front Oncol. 2020 Jul 31;10:1166. doi: 10.3389/fonc.2020.01166 (PMC7411471; doi:10.3389/fonc.2020.01166)
Supplement: Supplementary Table 2 — Identification of 32 candidate genes encompassing potential YTHDC2 binding site from m6AVar and RMbase databases. [file Table_2.XLSX]

## Sheet: Sheet1
GeneName	ModChr	m6A source (Level of evidence)	Total SupportNum	Highest Motif Score	Region
IGF1R	chr15	miCLIP (High)	230	419.59	cds
IFNAR2	chr21	miCLIP (High)	207	419.59	cds,intron,utr3
MET	chr7	miCLIP (High)	178	419.59	cds
IFNAR1	chr21	miCLIP (High)	177	419.59	cds
DDIT4	chr10	miCLIP (High)	177	419.59	utr3
COL6A1	chr21	miCLIP (High)	99	419.59	utr3,exon
RAC1	chr7	miCLIP (High)	88	371.87	utr3
CDKN1B	chr12	miCLIP&PA-m6A-Seq (High)	76	419.59	cds,intron
NR4A1	chr12	miCLIP (High)	67	419.59	intron,cds,exon
PIK3CD	chr1	miCLIP (High)	51	419.59	utr3
PTEN	chr10	miCLIP (High)	21	419.59	cds
JAK2	chr9	miCLIP (High)	5	419.59	utr3,exon
RBL2	chr16	miCLIP (High)	2	419.59	utr3,exon
TNC	chr9	MeRIP-Seq (Medium)	201	419.59	cds
MAGI1	chr3	MeRIP-Seq (Medium)	174	419.59	cds,utr3
PPP2R5B	chr11	MeRIP-Seq (Medium)	147	419.59	utr5,intron
VEGFA	chr6	MeRIP-Seq (Medium)	140	419.59	utr3,exon
RXRA	chr9	MeRIP-Seq (Medium)	135	419.59	utr3,exon
ITGB1	chr2	MeRIP-Seq (Medium)	122	419.59	cds
LAMB2	chr3	MeRIP-Seq (Medium)	94	419.59	utr5
CREB3	chr9	MeRIP-Seq (Medium)	74	419.59	cds,exon
BDNF	chr11	MeRIP-Seq (Medium)	67	419.59	cds,exon,utr3
COL1A1	chr17	MeRIP-Seq (Medium)	62	419.59	utr3
COL6A3	chr2	MeRIP-Seq (Medium)	60	419.59	exon,cds
ITGA3	chr17	MeRIP-Seq (Medium)	60	419.59	intron,utr3,exon
KRAS	chr12	MeRIP-Seq (Medium)	36	419.59	utr5
LAMA5	chr20	MeRIP-Seq (Medium)	34	419.59	utr3,exon
COL9A3	chr20	MeRIP-Seq (Medium)	32	419.59	cds,exon
PDGFC	chr4	MeRIP-Seq (Medium)	27	419.59	utr5
EFNA1	chr1	MeRIP-Seq (Medium)	19	419.59	exon,cds
CREB3L4	chr1	MeRIP-Seq (Medium)	4	419.59	exon
PDPK1	chr16	MeRIP-Seq (Medium)	2	419.59	utr3,exon,cds
Motif score is alignment score to evaluate the accuracy of identified motif regions of m6A
SupportNum is the number of supporting experiments or studies
